# Supplementary material for: Epidemiology of malaria, schistosomiasis, and geohelminthiasis amongst children 3–15 years of age during the dry season in Northern Cameroon
Source: PubMed Central journal article supplement (PMC10389741; doi:10.1371/journal.pone.0288560), 2023-07-31

**a**

PCR gel image of *Plasmodium falciparum*

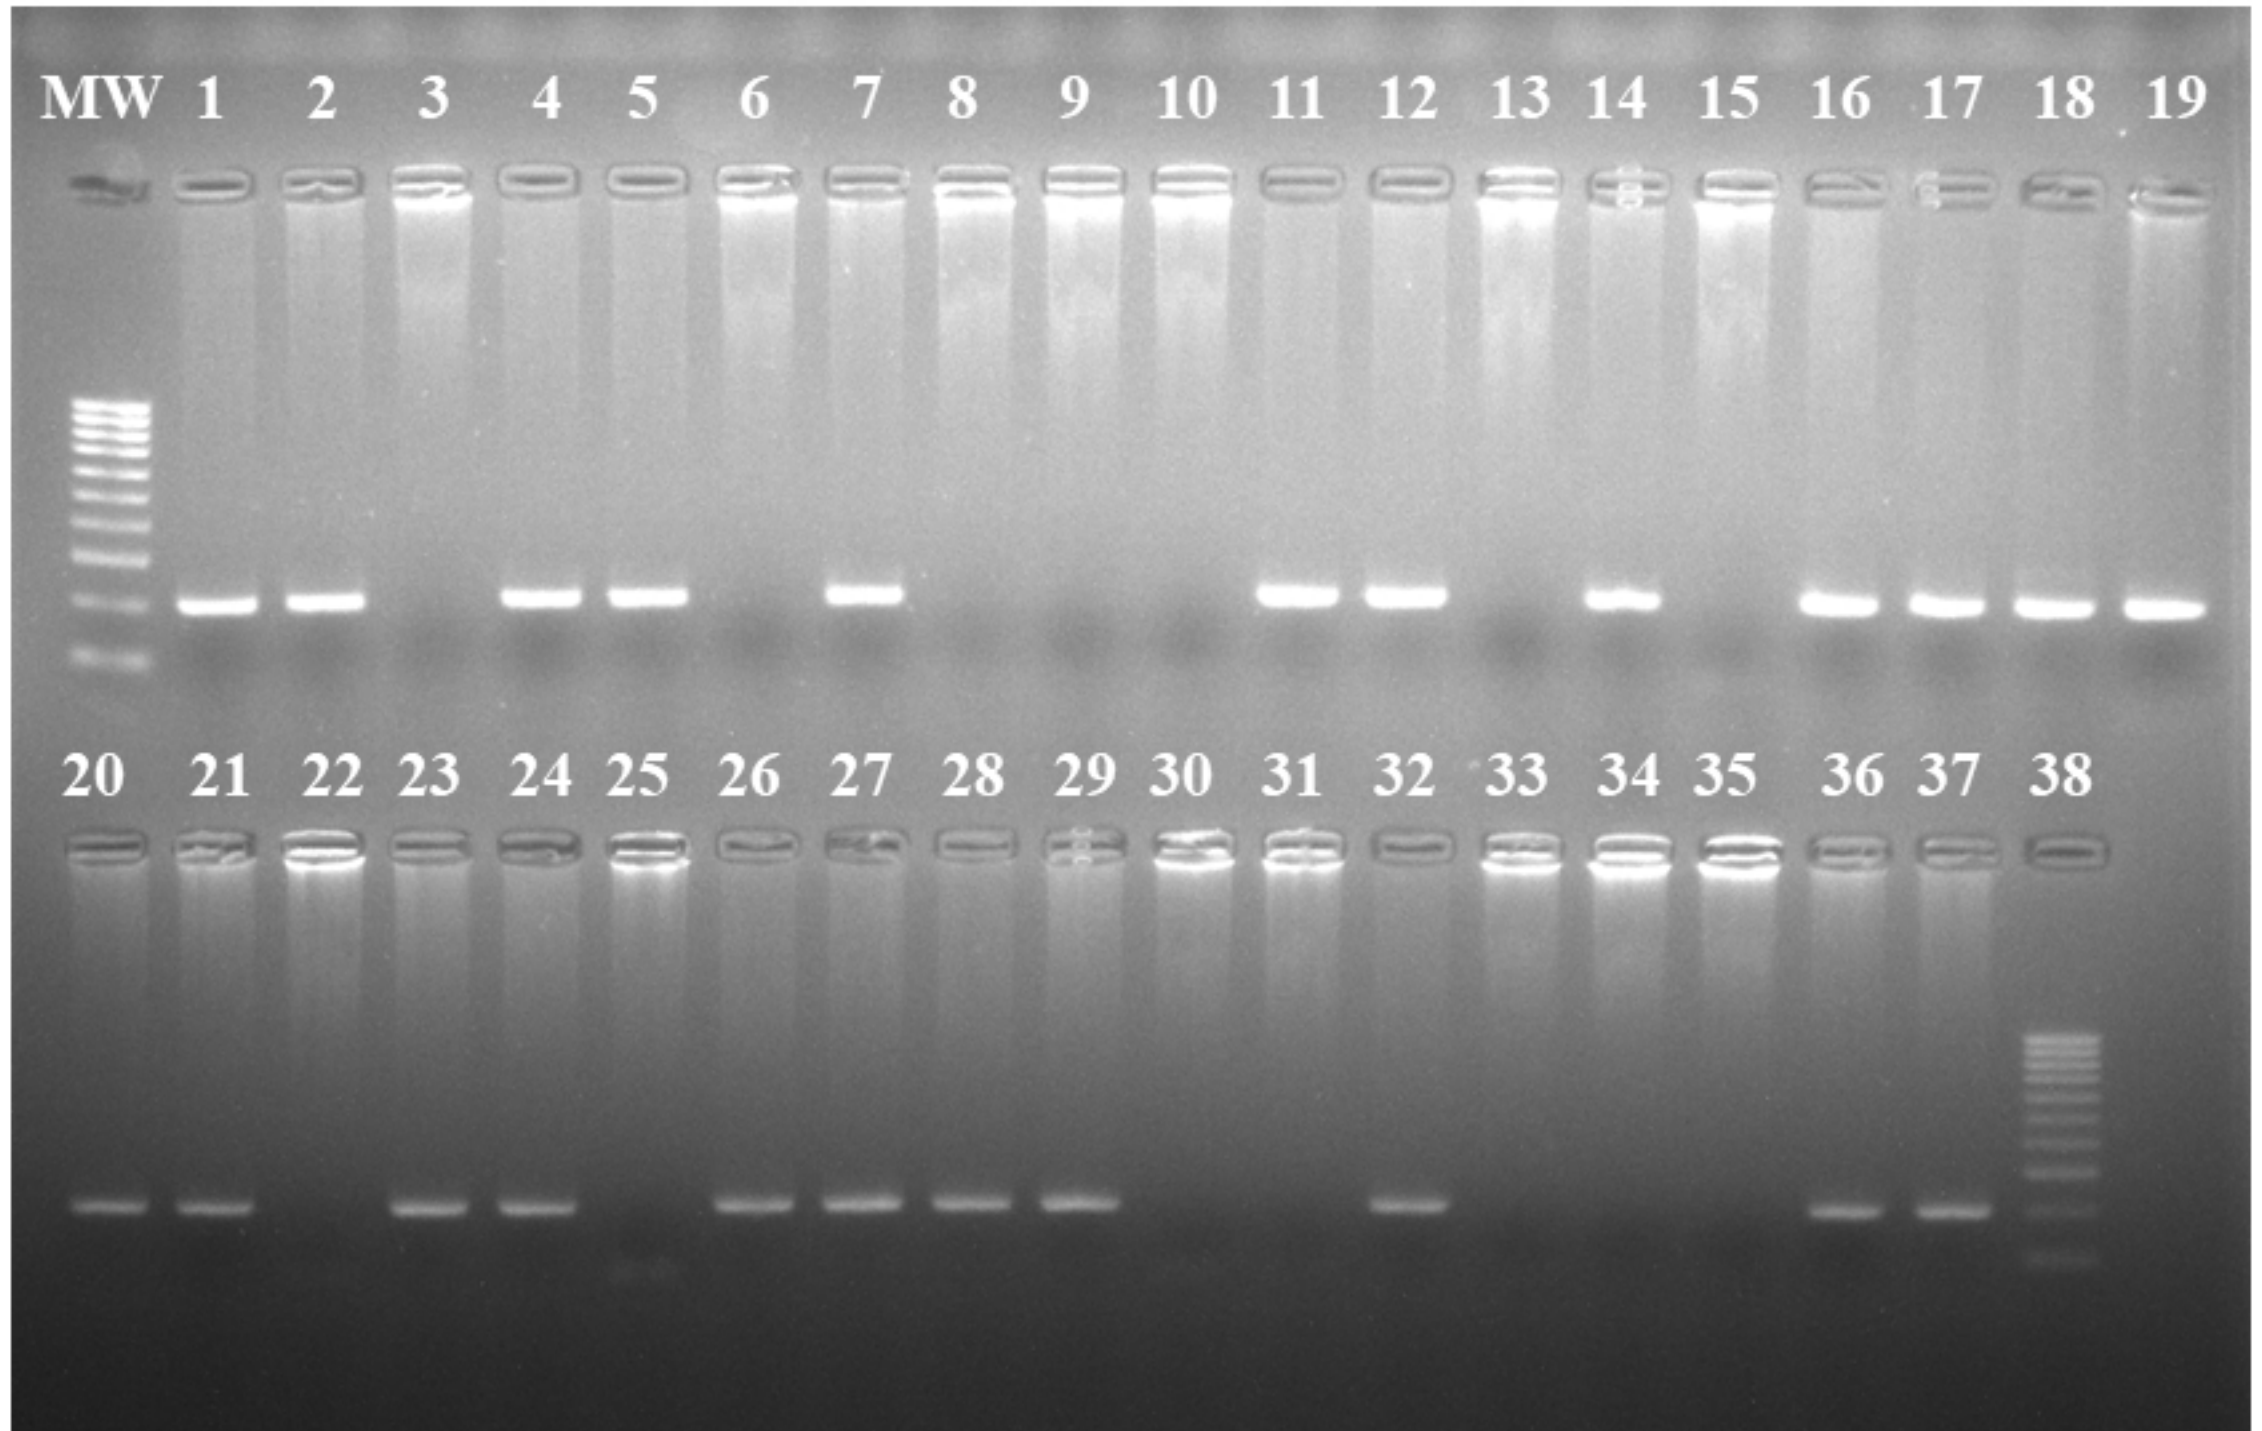

Where: MW = Molecular weight marker (100 bp)

Presence of bands = *P. falciparum* positive samples (205 bp)

No bands = *P. falciparum* negative samples

**b****PCR gel image of *Plasmodium malariae***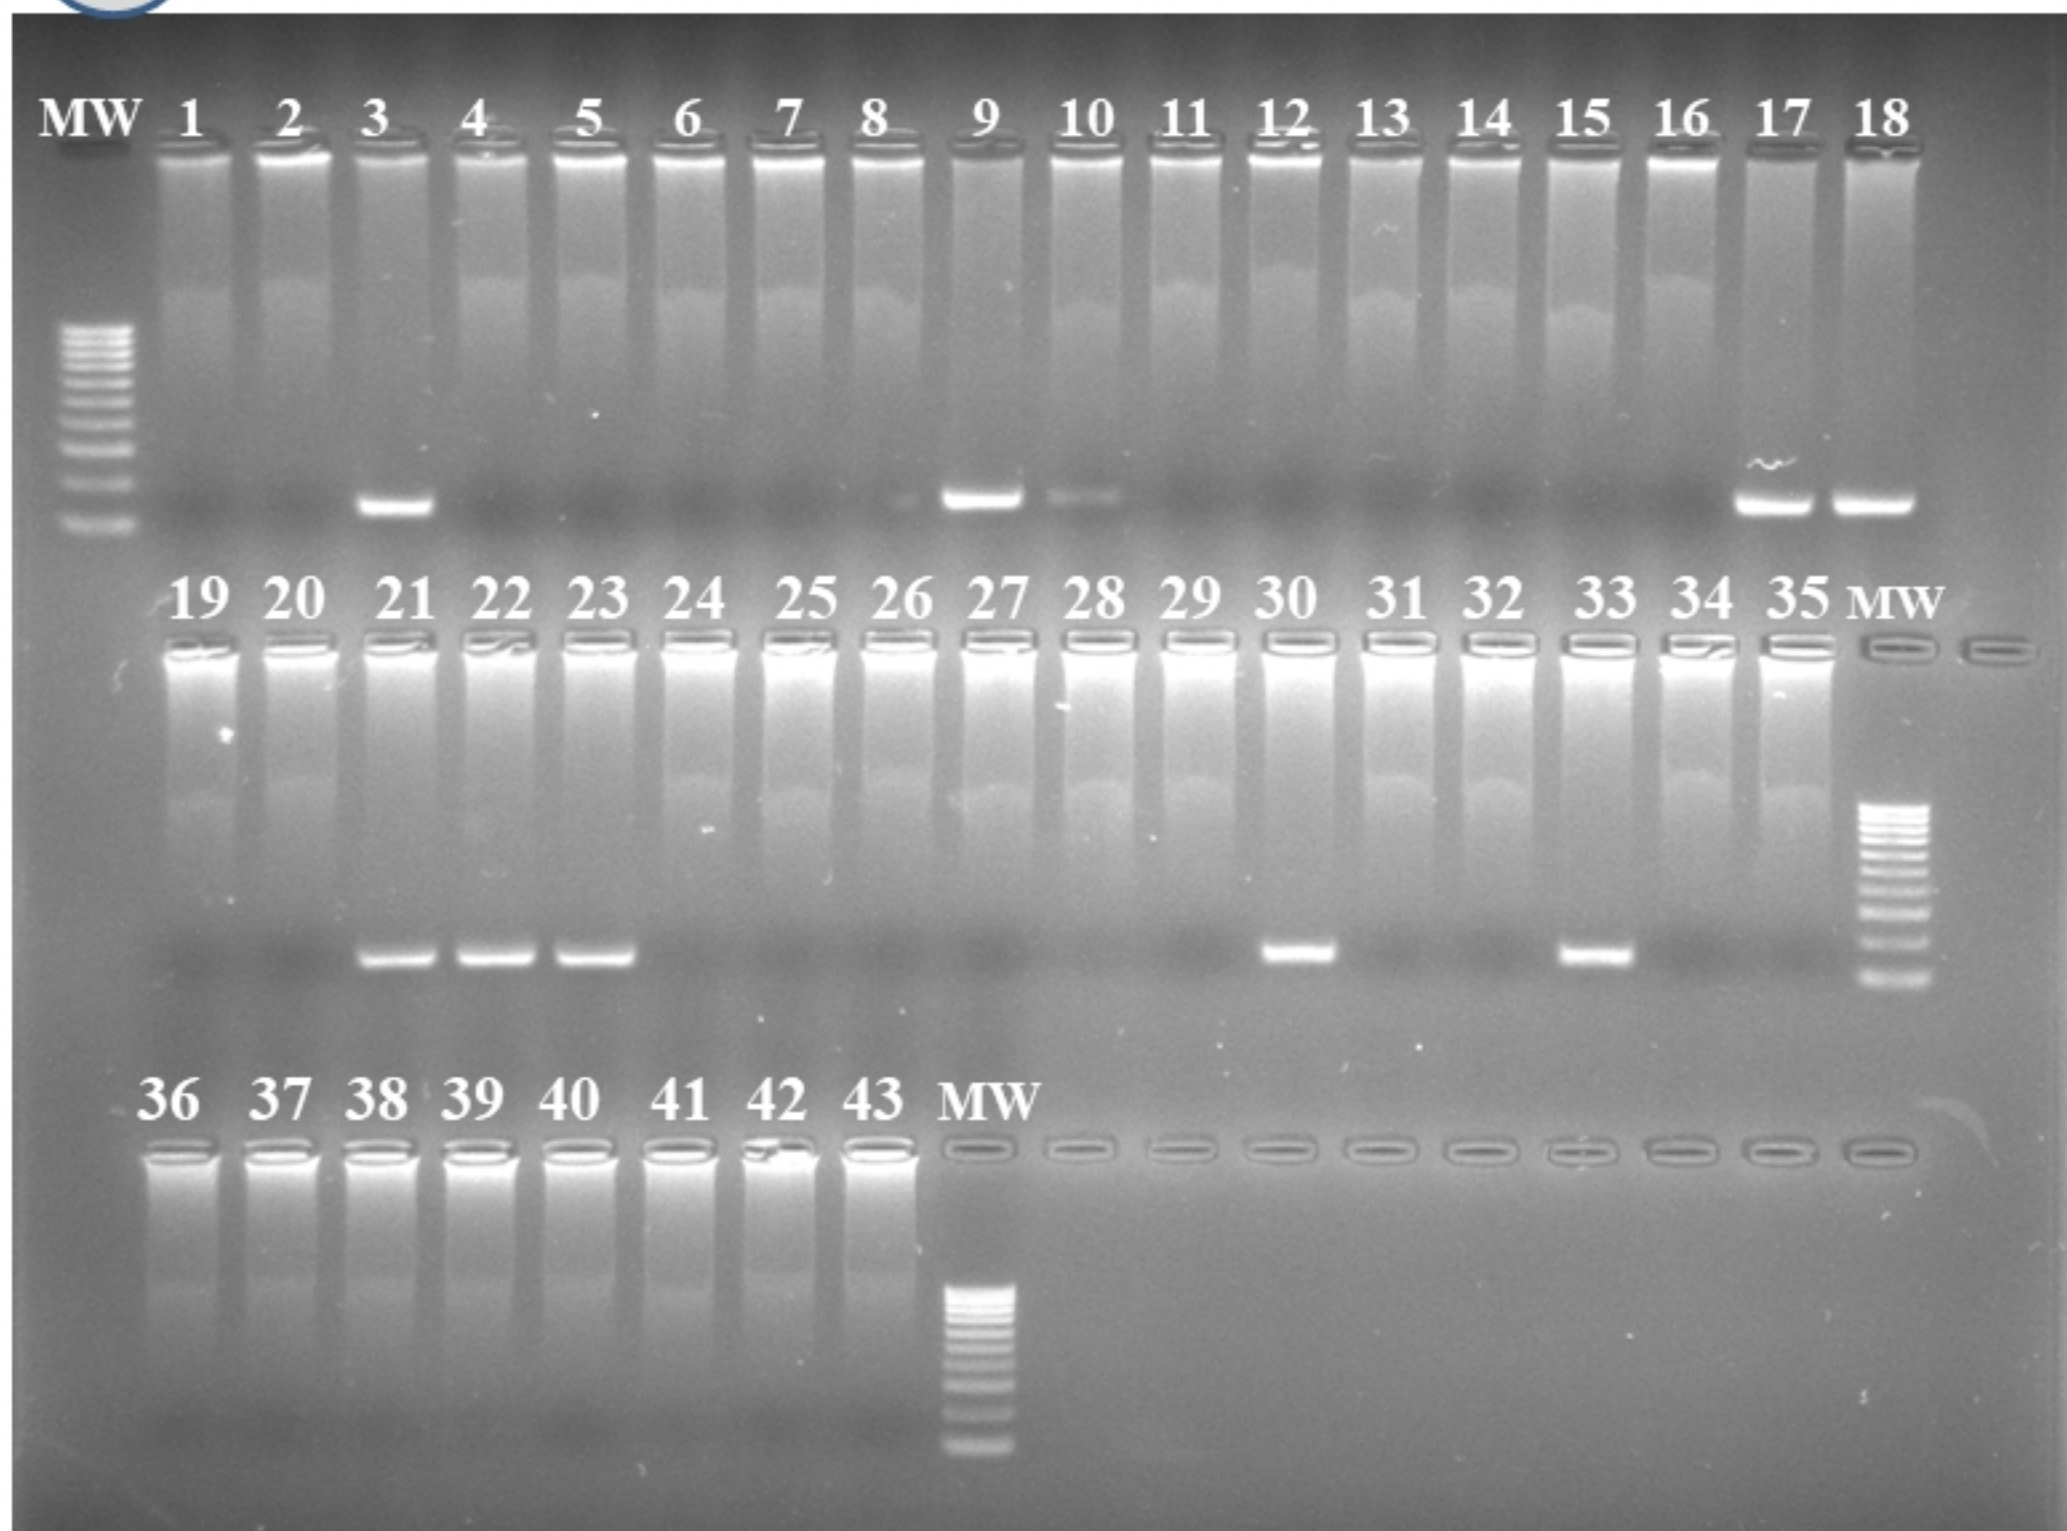

Where: MW = Molecular weight marker (100 bp)

Presence of bands = *P. malariae* positive samples (144 bp)

No bands = *P. malariae* negative samples



C

*S. haematobium* eggs in urine

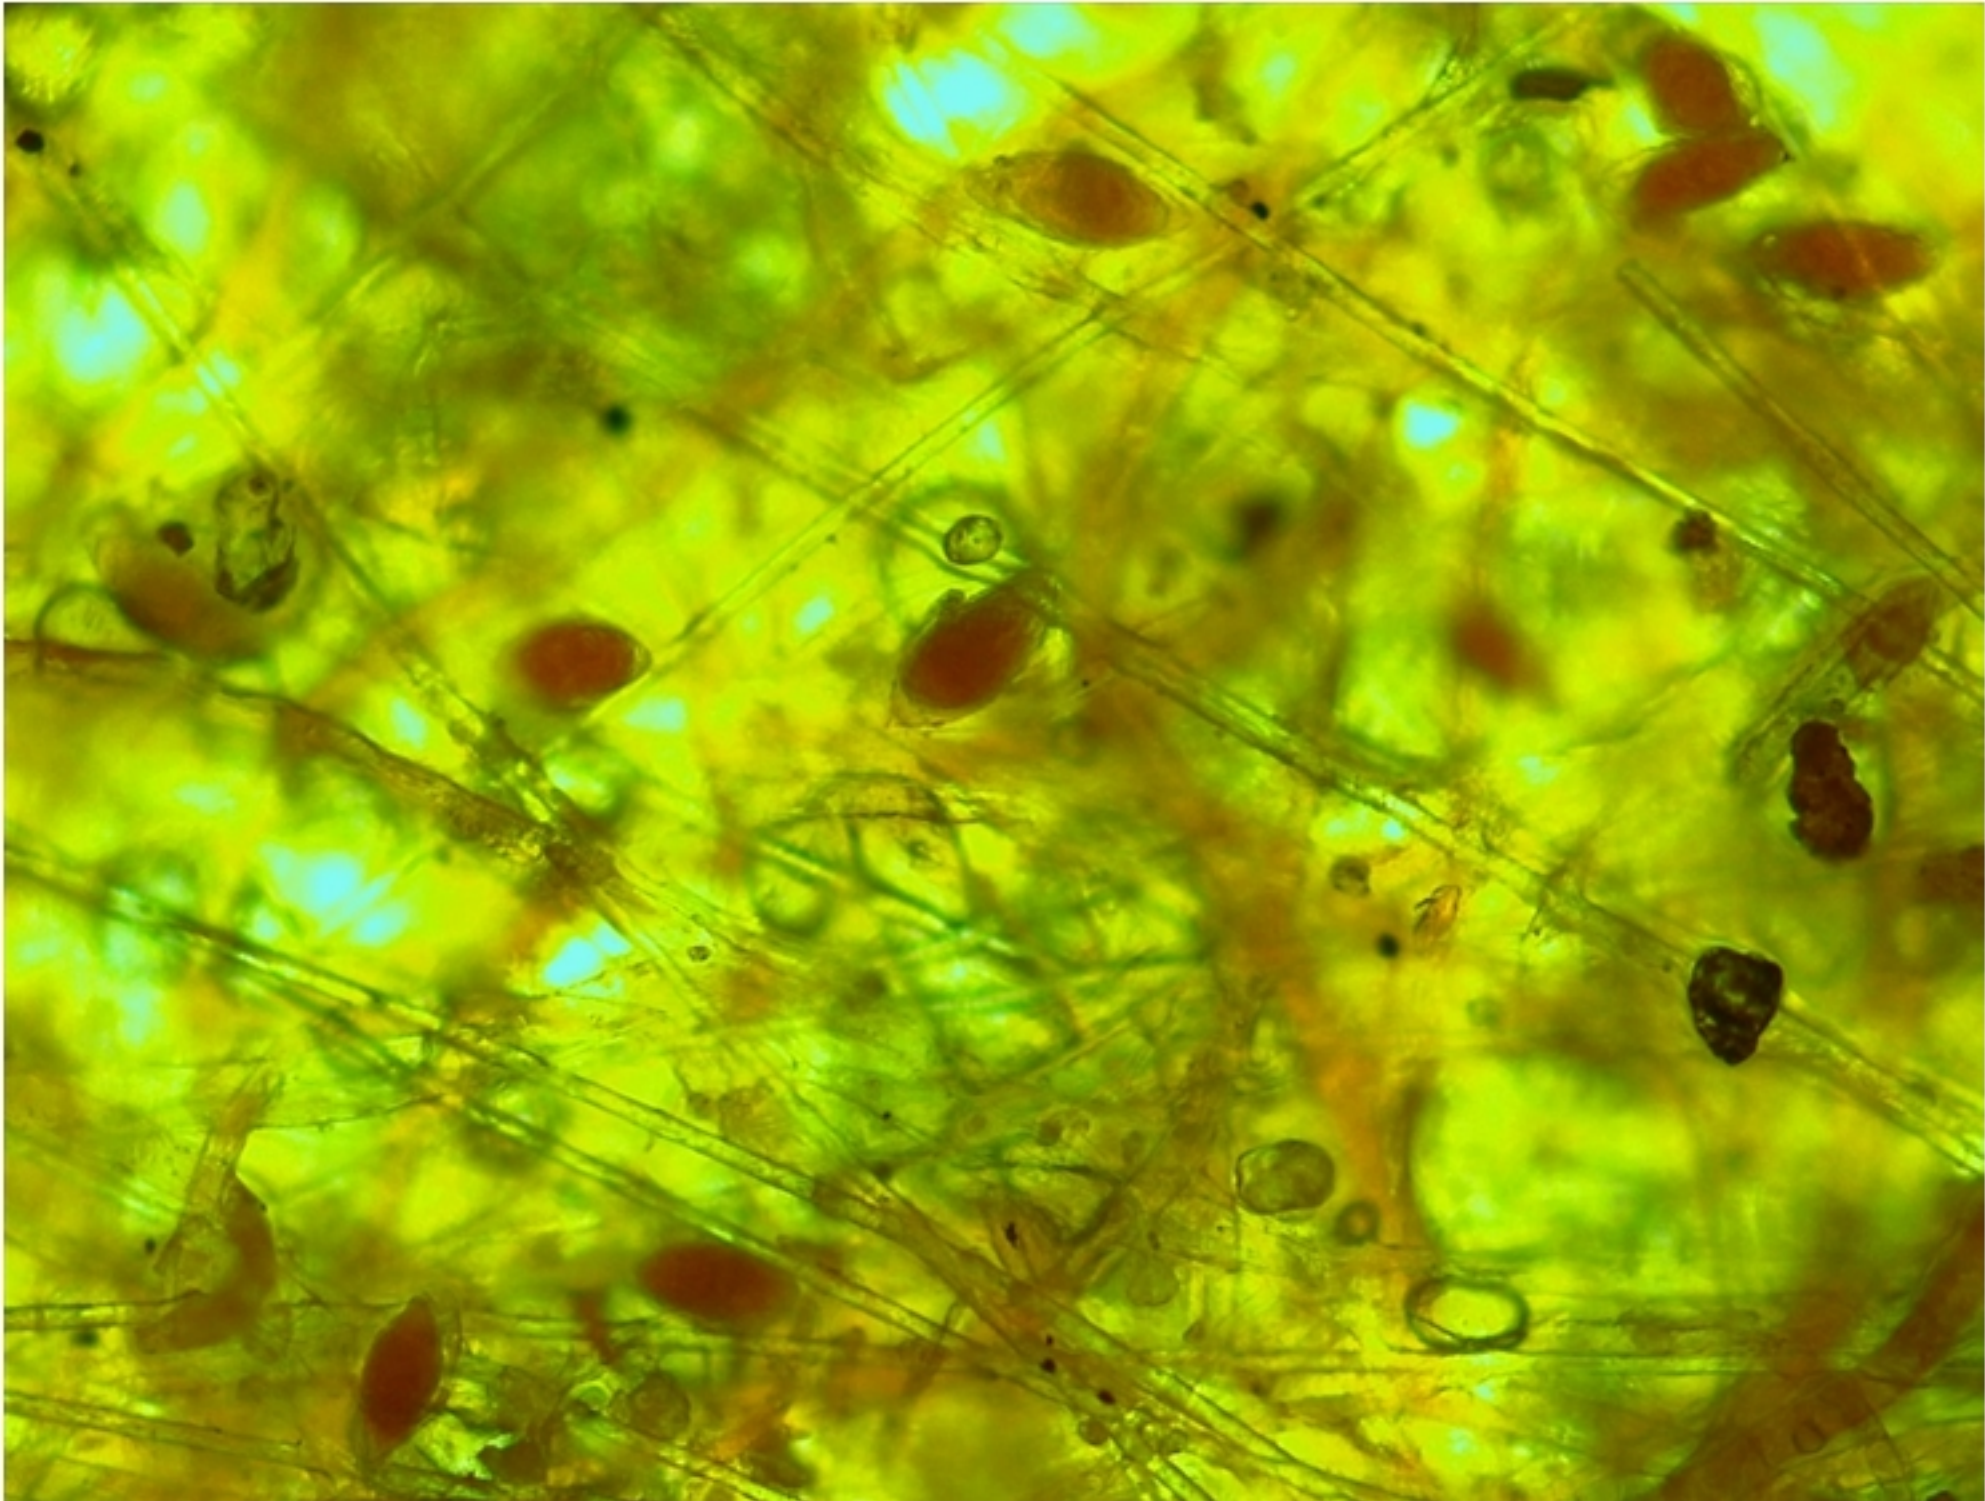

Supplement: pone.0288560.s005.pdf [file pone.0288560.s005.pdf]
